# Supplementary material for: Molecular evolution of type 2 porcine reproductive and respiratory syndrome viruses circulating in Vietnam from 2007 to 2015
Source: PubMed Central journal article supplement (PMC5112882; doi:10.1186/s12917-016-0885-3), 2016-11-17
Supplement: 12917_2016_885_MOESM1_ESM.pdf [file 12917_2016_885_MOESM1_ESM.pdf]

**Molecular Evolution of Type 2 Porcine Reproductive and Respiratory Syndrome Viruses Circulating in Vietnam from 2007 to 2015**

*Hai Quynh Do<sup>1</sup>, Dinh Thau Trinh<sup>1</sup>, Thi Lan Nguyen<sup>1</sup>, Thi Thu Hang Vu<sup>2</sup>, Duc Duong Than<sup>2</sup>, Thi Van Lo<sup>2</sup>, Minjoo Yeom<sup>3</sup>, Daesub Song<sup>3</sup>, SeEun Choe<sup>4</sup>, Dong-Jun An<sup>4</sup>, Van Phan Le<sup>1\*</sup>*

*Journal: BMC Veterinary Research*

\*Corresponding Author: Dr. Van Phan Le

Faculty of Veterinary Medicine, Vietnam National University of Agriculture (VNUA), Vietnam

Telephone: +84-914-938-793; Fax: +84-43.67625883; E-mail: [letranphan@vnua.edu.vn](mailto:letranphan@vnua.edu.vn)

**Supplement table 1: Vietnamese PRRSV strain used in this study**

| No | Strain   | Location (Province) | Year | Acession number | Note       |
|----|----------|---------------------|------|-----------------|------------|
| 1  | HUA/HP23 | Hung Yen            | 2013 | KX424897        | This study |
| 2  | HUA/HP22 | Hung Yen            | 2013 | KX424898        | This study |
| 3  | HUA/HP21 | Hung Yen            | 2013 | KX424899        | This study |
| 4  | HUA/HP20 | Hung Yen            | 2013 | KX424900        | This study |
| 5  | HUA/HP19 | Hung Yen            | 2013 | KX424901        | This study |
| 6  | HUA/HP38 | Thai Binh           | 2015 | KX424882        | This study |
| 7  | MUA/HP26 | Son La              | 2014 | KX424894        | This study |
| 8  | HUA/HP29 | Son La              | 2014 | KX424891        | This study |
| 9  | HUA/HP28 | Son La              | 2014 | KX424892        | This study |
| 10 | HUA/HP27 | Son La              | 2014 | KX424893        | This study |
| 11 | HUA/HP6  | Hai Duong           | 2013 | KX424902        | This study |
| 12 | HUA/HP7  | Hai Duong           | 2013 | KX424903        | This study |
| 13 | HUA/HP9  | Hai Phong           | 2013 | KX424904        | This study |
| 14 | HUA/HP11 | Hai Phong           | 2013 | KX424906        | This study |
| 15 | HUA/HP14 | Hai Duong           | 2012 | KX424912        | This study |
| 16 | HUA/HP13 | Yen Bai             | 2012 | KX424915        | This study |
| 17 | HUA/HP16 | Dien Bien           | 2012 | KX424913        | This study |
| 18 | HUA/HP5  | Lao Cai             | 2012 | KX424914        | This study |
| 19 | HUA/HP8  | Nghe An             | 2013 | KX424908        | This study |
| 20 | HUA/HP10 | Hai Phong           | 2013 | KX424905        | This study |
| 21 | HUA/HP12 | Hanoi               | 2013 | KX424907        | This study |
| 22 | HUA/HP15 | Hanoi               | 2013 | KX424909        | This study |
| 23 | HUA/HP18 | Hanoi               | 2013 | KX424910        | This study |
| 24 | HUA/HP17 | Hanoi               | 2013 | KX424911        | This study |
| 25 | HUA/HP24 | Hai Duong           | 2014 | KX424896        | This study |
| 26 | HUA/HP37 | Bac Ninh            | 2015 | KX424883        | This study |
| 27 | HUA/HP36 | Bac Ninh            | 2015 | KX424884        | This study |
| 28 | HUA/HP35 | Bac Ninh            | 2015 | KX424885        | This study |
| 29 | HUA/HP34 | Bac Ninh            | 2015 | KX424886        | This study |
| 30 | HUA/HP33 | Bac Ninh            | 2015 | KX424887        | This study |
| 31 | HUA/HP32 | Bac Ninh            | 2015 | KX424888        | This study |
| 32 | HUA/HP31 | Bac Ninh            | 2015 | KX424889        | This study |
| 33 | HUA/HP30 | Bac Ninh            | 2015 | KX424890        | This study |
| 34 | HUA/HP25 | Hai Duong           | 2014 | KX424895        | This study |
| 35 | HUA/HP1  | Bac Giang           | 2013 | KF699846        | This study |

|    |                  |                  |      |          |                             |
|----|------------------|------------------|------|----------|-----------------------------|
| 36 | HUA/HP1963       | Lao Cai          | 2011 | KF699844 | This study                  |
| 37 | HUA/HP2          | Bac Giang        | 2013 | KF699847 | This study                  |
| 38 | HUA/HP2228       | Hanoi            | 2012 | KF699845 | This study                  |
| 39 | HUA/HP3          | Vinhphuc         | 2013 | KF699848 | This study                  |
| 40 | HUA/HP4          | Vinhphuc         | 2013 | KF699849 | This study                  |
| 41 | 07QN             | Quang Nam        | 2007 | FJ394029 | Feng <i>et al.</i> , 2008   |
| 42 | 10Bali           | Bac Lieu         | 2010 | KF523295 |                             |
| 43 | 10HuY            | Hung Yen         | 2010 | KF523293 |                             |
| 44 | 10NgAn           | Nghe An          | 2010 | KF523296 |                             |
| 45 | 10QuNi           | Quang Ninh       | 2010 | KF523297 |                             |
| 46 | 10TiGi           | Tien Giang       | 2010 | KF523294 |                             |
| 47 | 171NA            | Nd <sup>‡</sup>  | 2010 | AB588638 |                             |
| 48 | 347KS            | Nd               | 2010 | AB588637 |                             |
| 49 | 347TKS           | Nd               | 2010 | AB588636 |                             |
| 50 | 4793TG           | Ho Chi Minh City | 2010 | HQ700874 |                             |
| 51 | 5076HCM          | Ho Chi Minh City | 2010 | HQ700875 |                             |
| 52 | 5077HCM          | Ho Chi Minh City | 2010 | HQ700876 |                             |
| 53 | 5111HCM          | Ho Chi Minh City | 2010 | HQ700877 |                             |
| 54 | 5112HCM          | Ho Chi Minh City | 2010 | HQ700878 |                             |
| 55 | 5172HCM          | Ho Chi Minh City | 2010 | HQ700879 |                             |
| 56 | 5215HCM          | Ho Chi Minh City | 2010 | HQ700880 |                             |
| 57 | 5251HCM          | Ho Chi Minh City | 2010 | HQ700881 |                             |
| 58 | 5280DAKN         | Ho Chi Minh City | 2010 | HQ700882 |                             |
| 59 | 5321HCM          | Ho Chi Minh City | 2010 | HQ700883 |                             |
| 60 | 5339HCM          | Ho Chi Minh City | 2010 | HQ700884 |                             |
| 61 | 5386BT           | Ho Chi Minh City | 2010 | HQ700885 |                             |
| 62 | 5402BD           | Ho Chi Minh City | 2010 | HQ700886 |                             |
| 63 | 5445HCM          | Ho Chi Minh City | 2010 | HQ700887 |                             |
| 64 | AGES/568-30FC/13 | Nd               | 2013 | KM588915 |                             |
| 65 | BDR1             | Binh Duong       | 2010 | JQ860381 | Nguyen <i>et al.</i> , 2013 |
| 66 | CTC1             | Can Tho          | 2012 | JQ860382 | Nguyen <i>et al.</i> , 2013 |
| 67 | CTC2             | Can Tho          | 2012 | JQ860383 | Nguyen <i>et al.</i> , 2013 |
| 68 | CTHS1            | Can Tho          | 2012 | JQ860384 | Nguyen <i>et al.</i> , 2013 |
| 69 | CTHS2            | Can Tho          | 2012 | JQ860385 | Nguyen <i>et al.</i> , 2013 |
| 70 | CTHS3            | Can Tho          | 2012 | JQ860386 | Nguyen <i>et al.</i> , 2013 |
| 71 | D1/HCM1/VN2013   | Ho Chi Minh City | 2013 | KR261789 | Do <i>et al.</i> , 2015     |
| 72 | D10/BD1/VN       | Binh Duong       | 2013 | KR261796 | Do <i>et al.</i> , 2015     |
| 73 | D11/HT2/VN2013   | Hanoi            | 2013 | KR261784 | Do <i>et al.</i> , 2015     |
| 74 | D12/HY/VN2013    | Hung Yen         | 2013 | KR261804 | Do <i>et al.</i> , 2015     |
| 75 | D13/BD2/VN       | Binh Duong       | 2014 | KR261795 | Do <i>et al.</i> , 2015     |
| 76 | D14/DN12/VN      | Dong Nai         | 2014 | KR261780 | Do <i>et al.</i> , 2015     |
| 77 | D15/BD3/VN       | Binh Duong       | 2014 | KR261790 | Do <i>et al.</i> , 2015     |
| 78 | D16/HCM2/VN      | Ho Chi Minh City | 2014 | KR261794 | Do <i>et al.</i> , 2015     |
| 79 | D18/ST0/VN       | Soc Trang        | 2014 | KR261803 | Do <i>et al.</i> , 2015     |
| 80 | D20/BDi1/VN      | Binh Dinh        | 2014 | KR261785 | Do <i>et al.</i> , 2015     |
| 81 | D21/BT1/VN       | Binh Thuan       | 2014 | KR261781 | Do <i>et al.</i> , 2015     |
| 82 | D22/ST1/VN       | Soc Trang        | 2014 | KR261800 | Do <i>et al.</i> , 2015     |
| 83 | D23/Btr1/VN      | Ben Tre          | 2014 | KR261791 | Do <i>et al.</i> , 2015     |
| 84 | D24/BD4/VN       | Binh Duong       | 2014 | KR261798 | Do <i>et al.</i> , 2015     |

|     |                 |                  |      |          |                             |
|-----|-----------------|------------------|------|----------|-----------------------------|
| 85  | D27/BT2/VN      | Binh Thuan       | 2014 | KR261799 | Do <i>et al.</i> , 2015     |
| 86  | D28/BT3/VN      | Binh Thuan       | 2014 | KR261775 | Do <i>et al.</i> , 2015     |
| 87  | D29/DN5/VN      | Dong Nai         | 2014 | KR261772 | Do <i>et al.</i> , 2015     |
| 88  | D3/BRTV1/VN2013 | Ba Ria Vung Tau  | 2013 | KR261797 | Do <i>et al.</i> , 2015     |
| 89  | D30/BD5/VN      | Binh Duong       | 2014 | KR261793 | Do <i>et al.</i> , 2015     |
| 90  | D31/BD6/VN      | Binh Duong       | 2014 | KR261805 | Do <i>et al.</i> , 2015     |
| 91  | D32/ST2/VN      | Soc Trang        | 2014 | KR261786 | Do <i>et al.</i> , 2015     |
| 92  | D33/HCM3/VN     | Ho Chi Minh City | 2014 | KR261773 | Do <i>et al.</i> , 2015     |
| 93  | D41/BT4/VN      | Binh Thuan       | 2014 | KR261782 | Do <i>et al.</i> , 2015     |
| 94  | D42/DN6/VN      | Dong Nai         | 2014 | KR261774 | Do <i>et al.</i> , 2015     |
| 95  | D43/DN7/VN      | Dong Nai         | 2014 | KR261792 | Do <i>et al.</i> , 2015     |
| 96  | D44/DN8/VN      | Dong Nai         | 2014 | KR261787 | Do <i>et al.</i> , 2015     |
| 97  | D49/DN9/VN      | Dong Nai         | 2014 | KR261779 | Do <i>et al.</i> , 2015     |
| 98  | D50/BD7/VN      | Binh Duong       | 2014 | KR261783 | Do <i>et al.</i> , 2015     |
| 99  | D51/DN10/VN     | Dong Nai         | 2014 | KR261802 | Do <i>et al.</i> , 2015     |
| 100 | D54/DN11/VN     | Dong Nai         | 2014 | KR261777 | Do <i>et al.</i> , 2015     |
| 101 | D8/DN3/VN       | Dong Nai         | 2014 | KR261776 | Do <i>et al.</i> , 2015     |
| 102 | D9/AG1/VN2013   | An Giang         | 2013 | KR261788 | Do <i>et al.</i> , 2015     |
| 103 | D9/AG2/VN2013   | An Giang         | 2013 | KR261801 | Do <i>et al.</i> , 2015     |
| 104 | DN1             | Dong Nai         | 2010 | JQ860375 | Nguyen <i>et al.</i> , 2013 |
| 105 | DN11            | Dong Nai         | 2010 | JQ860378 | Nguyen <i>et al.</i> , 2013 |
| 106 | DN1107          | Dong Nai         | 2009 | JQ860373 | Nguyen <i>et al.</i> , 2013 |
| 107 | DN1155          | Dong Nai         | 2009 | JQ860374 | Nguyen <i>et al.</i> , 2013 |
| 108 | DN153           | Dong Nai         | 2008 | JQ860371 | Nguyen <i>et al.</i> , 2013 |
| 109 | DN292           | Dong Nai         | 2009 | JQ860372 | Nguyen <i>et al.</i> , 2013 |
| 110 | DN4             | Dong Nai         | 2010 | JQ860376 | Nguyen <i>et al.</i> , 2013 |
| 111 | DN42            | Dong Nai         | 2009 | JQ860367 | Nguyen <i>et al.</i> , 2013 |
| 112 | DN44            | Dong Nai         | 2009 | JQ860368 | Nguyen <i>et al.</i> , 2013 |
| 113 | DN444           | Dong Nai         | 2008 | JQ860362 | Nguyen <i>et al.</i> , 2013 |
| 114 | DN452           | Dong Nai         | 2008 | JQ860363 | Nguyen <i>et al.</i> , 2013 |
| 115 | DN460           | Dong Nai         | 2008 | JQ860364 | Nguyen <i>et al.</i> , 2013 |
| 116 | DN499           | Dong Nai         | 2008 | JQ860365 | Nguyen <i>et al.</i> , 2013 |
| 117 | DN52            | Dong Nai         | 2010 | JQ860377 | Nguyen <i>et al.</i> , 2013 |
| 118 | DN59            | Dong Nai         | 2009 | JQ860369 | Nguyen <i>et al.</i> , 2013 |
| 119 | DN649           | Dong Nai         | 2008 | JQ860366 | Nguyen <i>et al.</i> , 2013 |
| 120 | DN88            | Dong Nai         | 2009 | JQ860370 | Nguyen <i>et al.</i> , 2013 |
| 121 | DT7             | Dong Thap        | 2012 | JQ860387 | Nguyen <i>et al.</i> , 2013 |
| 122 | DT8             | Dong Thap        | 2012 | JQ860388 | Nguyen <i>et al.</i> , 2013 |
| 123 | DT9             | Dong Thap        | 2012 | JQ860389 | Nguyen <i>et al.</i> , 2013 |
| 124 | HCM3416         | Binh Duong       | 2010 | HQ540650 |                             |
| 125 | HCMC2394        | Ho Chi Minh City | 2010 | HQ540653 |                             |
| 126 | HCMC3336        | An Giang         | 2010 | HQ540646 |                             |
| 127 | HCMC3341        | Ho Chi Minh City | 2010 | HQ540647 |                             |
| 128 | HCMC3374        | Ho Chi Minh City | 2010 | HQ540648 |                             |
| 129 | HCMC3411        | Binh Duong       | 2010 | HQ540649 |                             |
| 130 | HCMC3440        | Binh Duong       | 2010 | HQ540651 |                             |
| 131 | HCMC3703        | Binh Duong       | 2010 | HQ540652 |                             |
| 132 | HCMCC3          | Ho Chi Minh City | 2010 | JQ860379 | Nguyen <i>et al.</i> , 2013 |
| 133 | HCMD06          | Ho Chi Minh City | 2010 | JQ860380 | Nguyen <i>et al.</i> , 2013 |

|     |                  |           |      |          |                             |
|-----|------------------|-----------|------|----------|-----------------------------|
| 134 | HGRV1            | Hau Giang | 2012 | JQ860390 | Nguyen <i>et al.</i> , 2013 |
| 135 | HGRV2            | Hau Giang | 2012 | JQ860391 | Nguyen <i>et al.</i> , 2013 |
| 136 | HUAVetlabPRRS1   | Nd        | 2011 | AB856283 |                             |
| 137 | HUAVetlabPRRS2   | Nd        | 2011 | AB856284 |                             |
| 138 | HUAVetlabPRRS3   | Nd        | 2012 | AB856285 |                             |
| 139 | HUAVetlabPRRS4   | Nd        | 2012 | AB856286 |                             |
| 140 | MB6              | Nd        | 2010 | KM244761 |                             |
| 141 | MN1              | Nd        | 2013 | KM244763 |                             |
| 142 | NA/VIE/V001/2010 | Nd        | 2010 | KF698650 |                             |
| 143 | NA/VIE/V056/2010 | Nd        | 2010 | KF698651 |                             |
| 144 | SRV07            | Nd        | 2007 | JX512910 |                             |

---

‡: Not determined
